# Supplementary material for: Effects of poor sleep on the immune cell landscape as assessed by single-cell analysis
Source: PubMed Central journal article supplement (PMC8617259; doi:10.1038/s42003-021-02859-8), 2021-11-25
Supplement: 42003_2021_2859_MOESM1_ESM.pdf [file 42003_2021_2859_MOESM1_ESM.pdf]

**Supplementary Figure 1. The clustering strategy in CyTOF.**

**a** t-SNE projection showing TC, NK, BC and MYE in CyTOF. **b** t-SNE projections segregated into preSU and postSU groups. **c** t-SNE projections showing the expressions of canonical markers. **d** Mean population expression levels of 31 type markers used for t-SNE visualization and FlowSOM clustering.

The full names of the 25 cell types in CyTOF are as follows: CD4 Naive: CD4<sup>+</sup> naive T cell; CD4 T<sub>CM</sub>, central memory CD4<sup>+</sup> T cell; CD4 T<sub>EM</sub>, effector memory CD4<sup>+</sup> T cell; CD4 Treg, regulatory CD4<sup>+</sup> T cell; CD4 CTL, cytotoxic CD4<sup>+</sup> T cell; CD4 Tex, exhausted CD4<sup>+</sup> T cell; CD8 Naive: CD8<sup>+</sup> naive T cell; CD8 T<sub>EM</sub>, effector memory CD8<sup>+</sup> T cell; CD8 CTL, cytotoxic CD8<sup>+</sup> T cell; CD8 Tex, exhausted CD8<sup>+</sup> T cell; DNT, double-negative T cell; DPT, double-positive T cell; T-mito, mitotic T cell; NK1, CD16<sup>-</sup> CD56<sup>bright</sup> NK; NK2, CD16<sup>+</sup> CD56<sup>dim</sup> CD57<sup>-</sup> NK; NK3, the CD16<sup>+</sup> CD56<sup>dim</sup> CD57<sup>+</sup> late NK; NBC, naive B cell; MBC, memory B cell; PC, plasma cell; ABC, age-associated B cell; cMC, classical monocyte; nMC, nonclassical monocyte; iMC, intermediate monocyte; cDC, conventional DC; pDC, plasmacytoid DC.

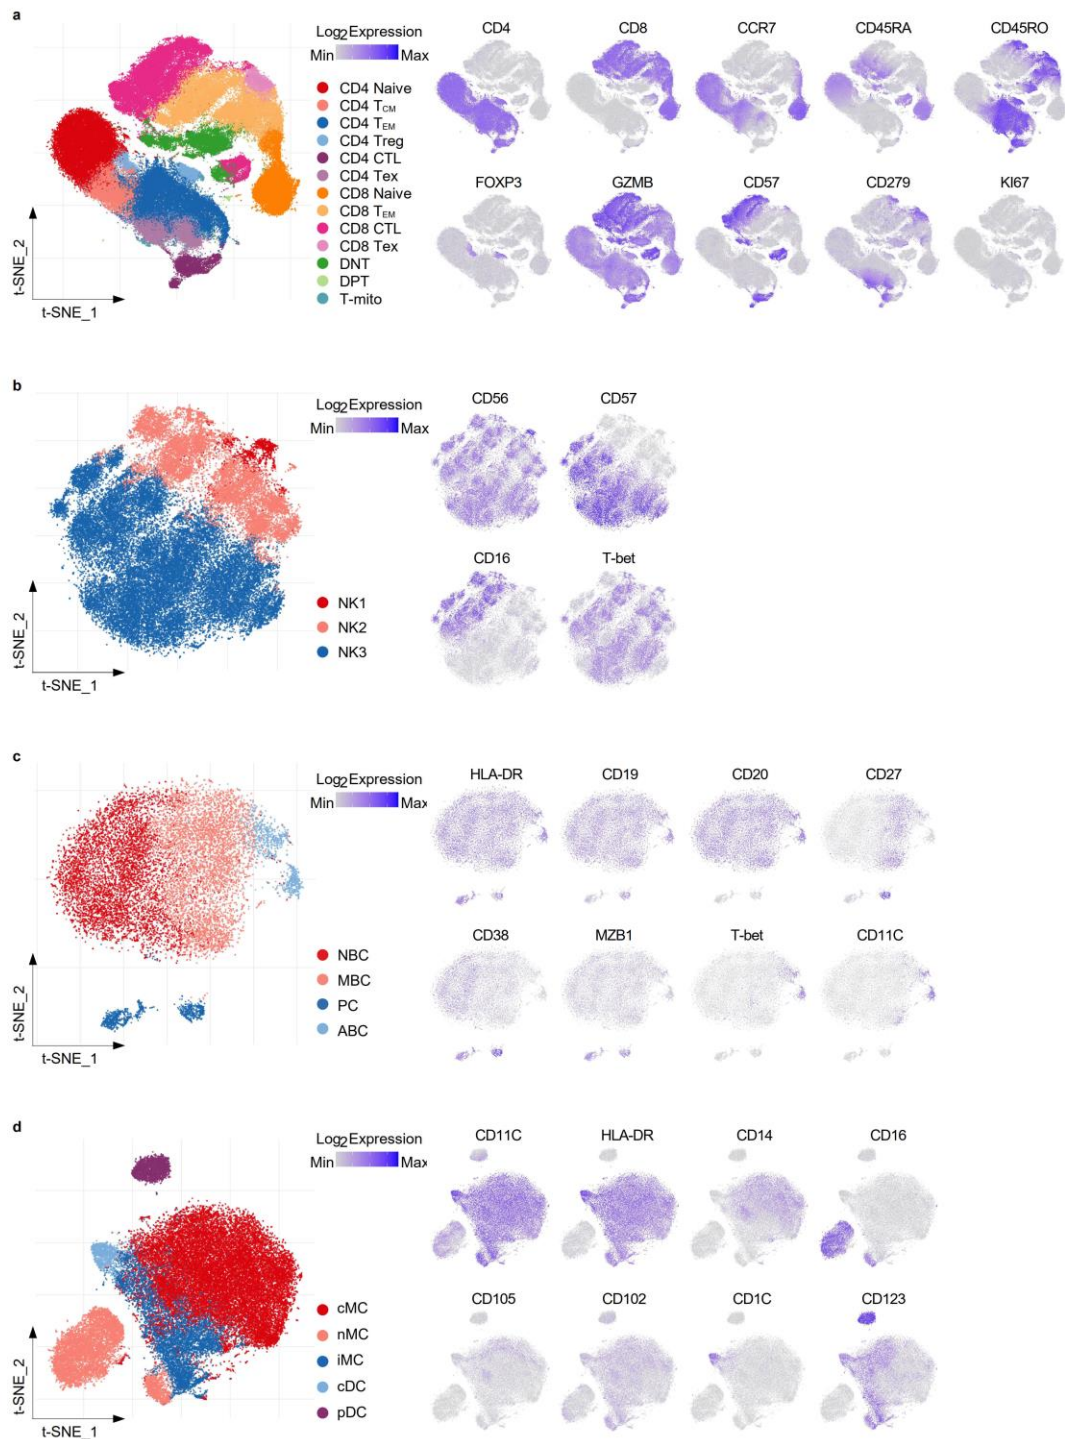

**Supplementary Figure 2. Re-clustering of major immune cell populations.**

**(a)** The clustering strategy of TC subsets. t-SNE projections showing TC subsets and canonical markers. **(b)** The clustering strategy of NK subsets. t-SNE projections showing NK subsets and canonical markers. **(c)** The clustering strategy of BC subsets. t-SNE projections showing BC subsets and canonical markers. **(d)** The clustering strategy of MYE subsets. t-SNE projections showing MYE subsets and canonical markers.

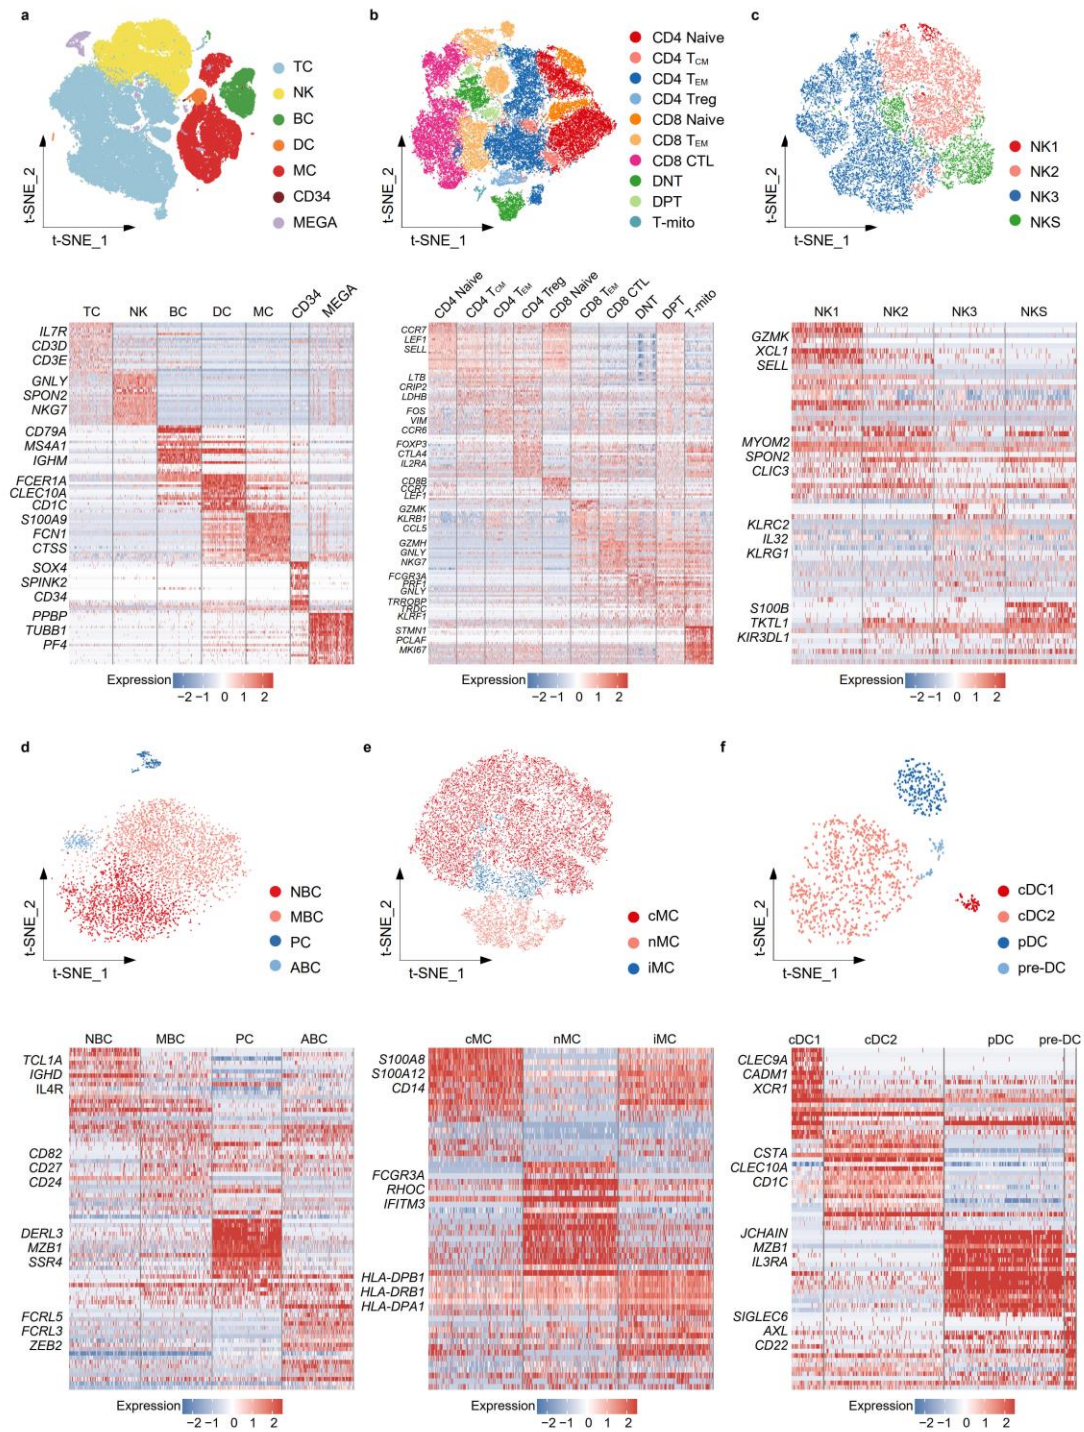

### Supplementary Figure 3. Clustering strategy in scRNA-seq.

The clustering strategy of major immune cell populations (**a**) identifying seven cell types (top) based on the scaled expression heatmap of discriminative gene for each cluster (bottom). Then TC (**b**), NK (**c**), BC (**d**), MC (**e**), DC (**f**) was re-clustered and identified classical subsets (top) based on the scaled expression heatmap of discriminative gene for each cluster (bottom). Color scheme is based on z-score distribution from  $-2$  (blue) to  $2$  (red).

The full names of the 25 cell types in scRNA-seq are as follows: CD4 Naive: CD4<sup>+</sup> naive T cell; CD4 T<sub>CM</sub>, central memory CD4<sup>+</sup> T cell; CD4 T<sub>EM</sub>, effector memory CD4<sup>+</sup> T cell; CD4 Treg, regulatory CD4<sup>+</sup> T cell; CD8 Naive: CD8<sup>+</sup> naive T cell; CD8 T<sub>EM</sub>, effector memory CD8<sup>+</sup> T cell; CD8 CTL, cytotoxic CD8<sup>+</sup> T cell; DNT, double-negative T cell; DPT, double-positive T cell; T-mito, mitotic T cell; NK1, *FCGR3A*<sup>-</sup> *NCAM1*<sup>bright</sup> NK; NK2, *FCGR3A*<sup>+</sup> *NCAM1*<sup>dim</sup> *B3GAT1*<sup>-</sup> NK; NK3, the *FCGR3A*<sup>+</sup> *NCAM1*<sup>dim</sup> *B3GAT1*<sup>+</sup> late NK; NKS, *S100B*<sup>+</sup> NK; NBC, naive B cell; MBC, memory B cell; PC, plasma cell; ABC, autoimmunity-associated B cell; cMC, classical monocyte; nMC, nonclassical monocyte; iMC, intermediate monocyte; cDC1, conventional DC type 1; cDC2, conventional DC type 2; pDC, plasmacytoid DC; pre-DC, precursor DC.

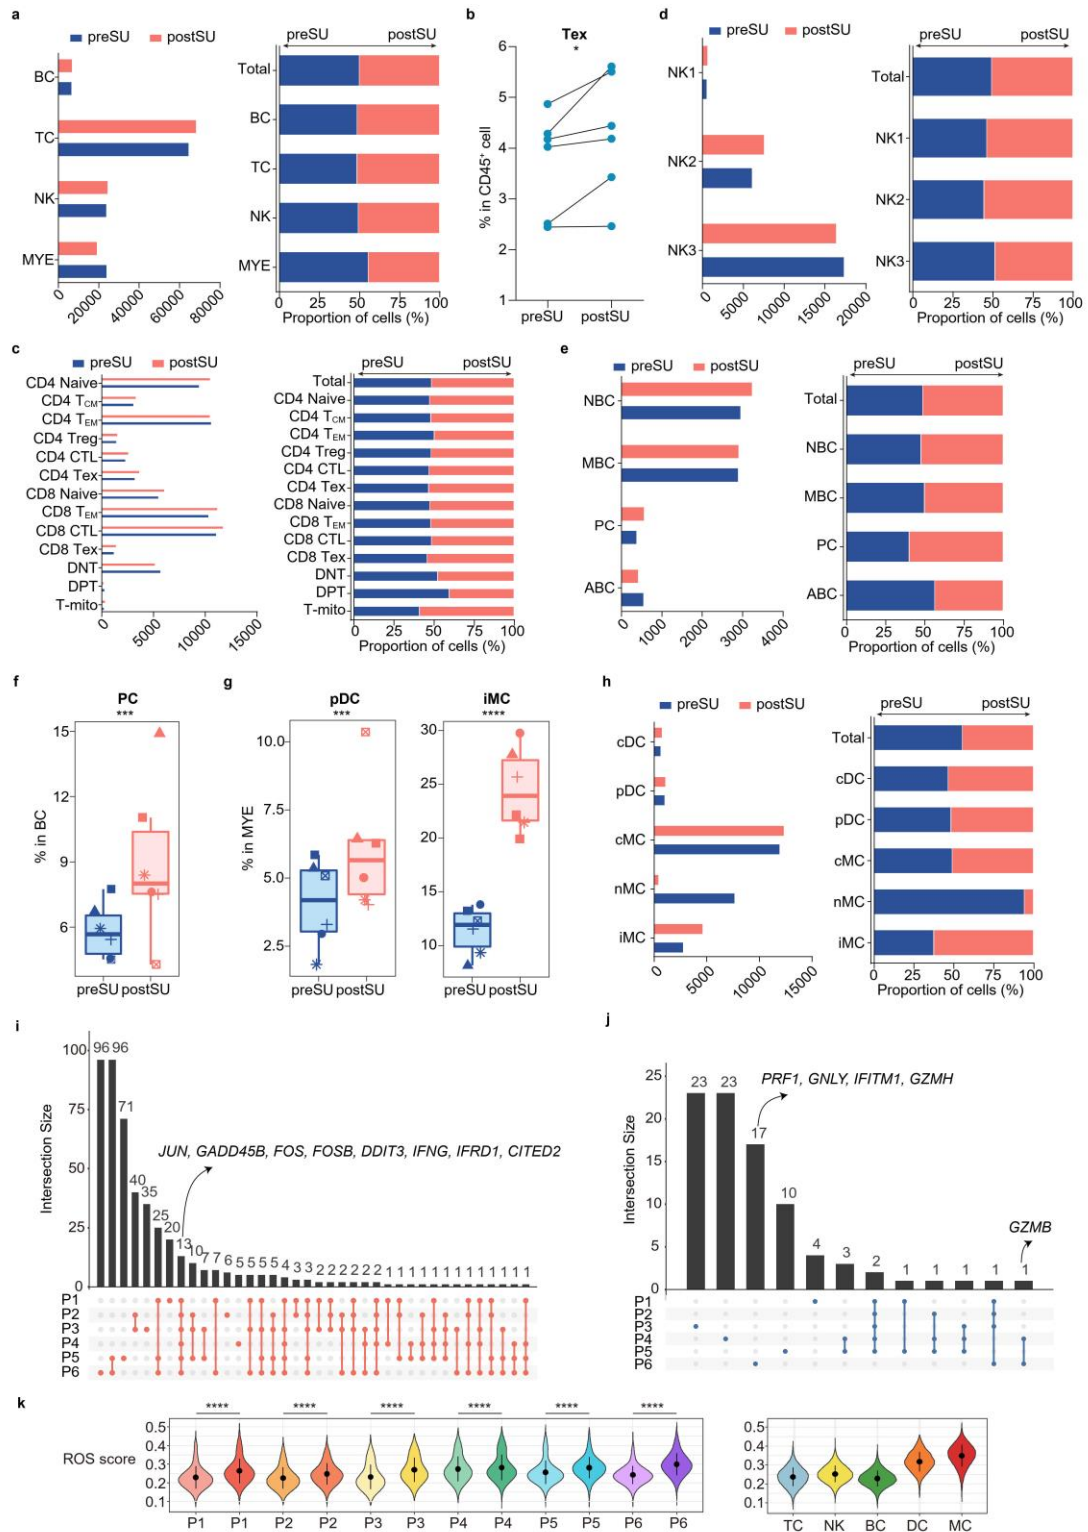

**Supplementary Figure 4. Changes in cell proportions and transcriptional state among subjects after SU.**

**a** Bar plots highlighting cell abundances across 4 main immune cell lineages for the preSU and postSU groups. **b** The percentage of Tex in immune cell between preSU and postSU groups (n = 6 /group). **c** Bar plots highlighting cell abundances across 13 TC-subclusters (**c**), 3 NK-subclusters (**d**), 4 BC-subclusters (**e**), 5 MYE-subclusters (**h**) for the preSU and postSU groups.

**f** The percentage of PC in BC between preSU and postSU groups (n = 6 /group). **g** The percentage of pDC and iMC in MYE between preSU and postSU groups (n = 6 /group). **i** UpSet Plot showing the integrated comparative analysis of upregulated DEGs among subjects. **j** UpSet Plot showing the integrated comparative analysis of downregulated DEGs among subjects. **k** Violin plot of ROS score for each sample and immune cell lineage. Different participants were represented in different colors, with darker colors representing after SU. For the box plot within each violin plot, middle lines indicate median values, boxes range from the 25th to 75th percentiles. Significance in b was calculated using two-tailed paired t test; significance in f and g was calculated using the "diffcyt-DA-GLMM" method as implemented in the "diffcyt" function in view of the subjects pairing; significance in k was calculated using two-sided Wilcoxon test as implemented in the function "compare\_means" with default parameters; \*P < 0.05, \*\*\*P < 0.001, \*\*\*\*P < 0.0001.

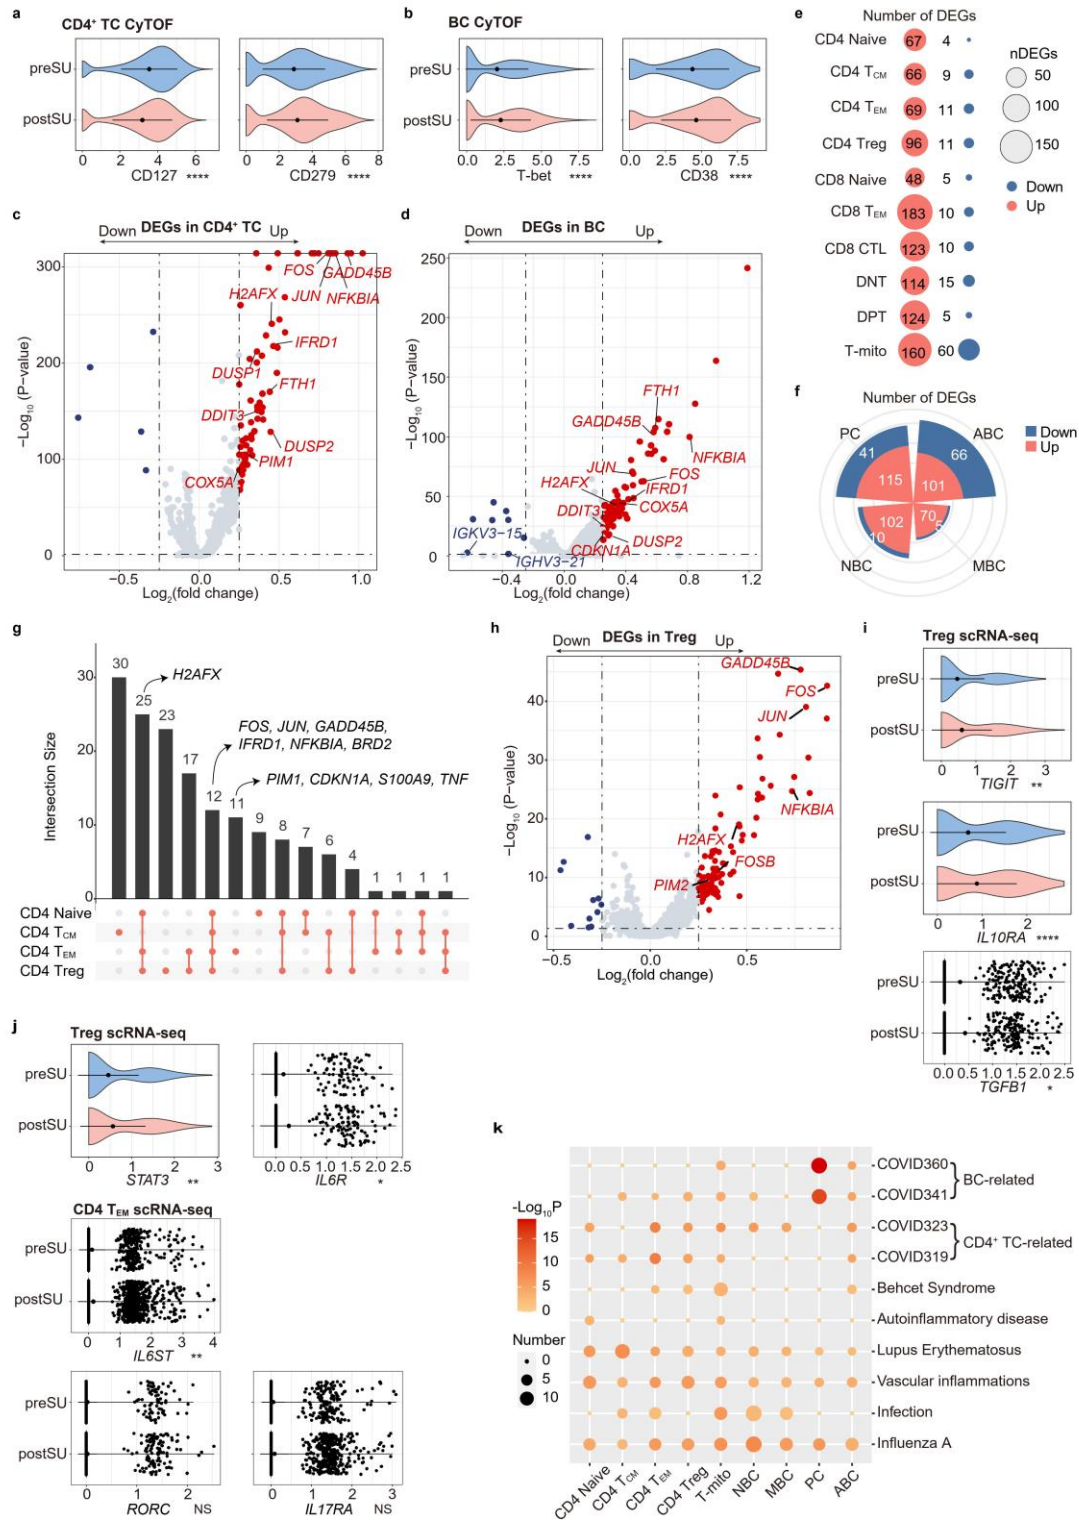

**Supplementary Figure 5. Changes in proteomic and transcriptional profiles of CD4<sup>+</sup> TC, T-mito and BC.**

**a** Violin plot showing the expression of CD127 and CD279 in CD4<sup>+</sup> TC between preSU and postSU groups in CyTOF. **b** Violin plot showing the expression of T-bet and CD38 in BC between preSU and postSU groups in CyTOF. **c** Volcano plot showing DEGs in CD4<sup>+</sup> TC between preSU and postSU groups. **d** Volcano plot showing DEGs in BC between preSU and



postSU groups. **e** Dot plot showing the numbers of DEGs of TC subsets. **f** Rose diagram showing the numbers of DEGs in BC subsets. **g** UpSet Plot showing the integrated comparative analysis of upregulated DEGs in CD4<sup>+</sup> TC subsets. **h** Volcano plot showing DEGs in Treg between preSU and postSU groups. **i** Violin plot showing the expression of *TIGIT*, *IL10RA*, *TGFB1* in Treg between preSU and postSU groups in scRNA-seq. **j** Violin plot showing the expression of *STAT3*, *IL6R* in Treg, and *IL6ST*, *RORC* and *IL17RA* in CD4 T<sub>EM</sub> between preSU and postSU groups in scRNA-seq. **k** Representative COVID and DisGeNET terms in CD4<sup>+</sup> TC, T-mito and BC subsets upregulated by SU. For the box plot within each violin plot, middle lines indicate median values, boxes range from the 25th to 75th percentiles. Significance in a, b, i and j was calculated using two-sided Wilcoxon test as implemented in the function “compare\_means” with default parameters; \*\*P < 0.01, \*\*\*\*P < 0.0001, NS (not significant).

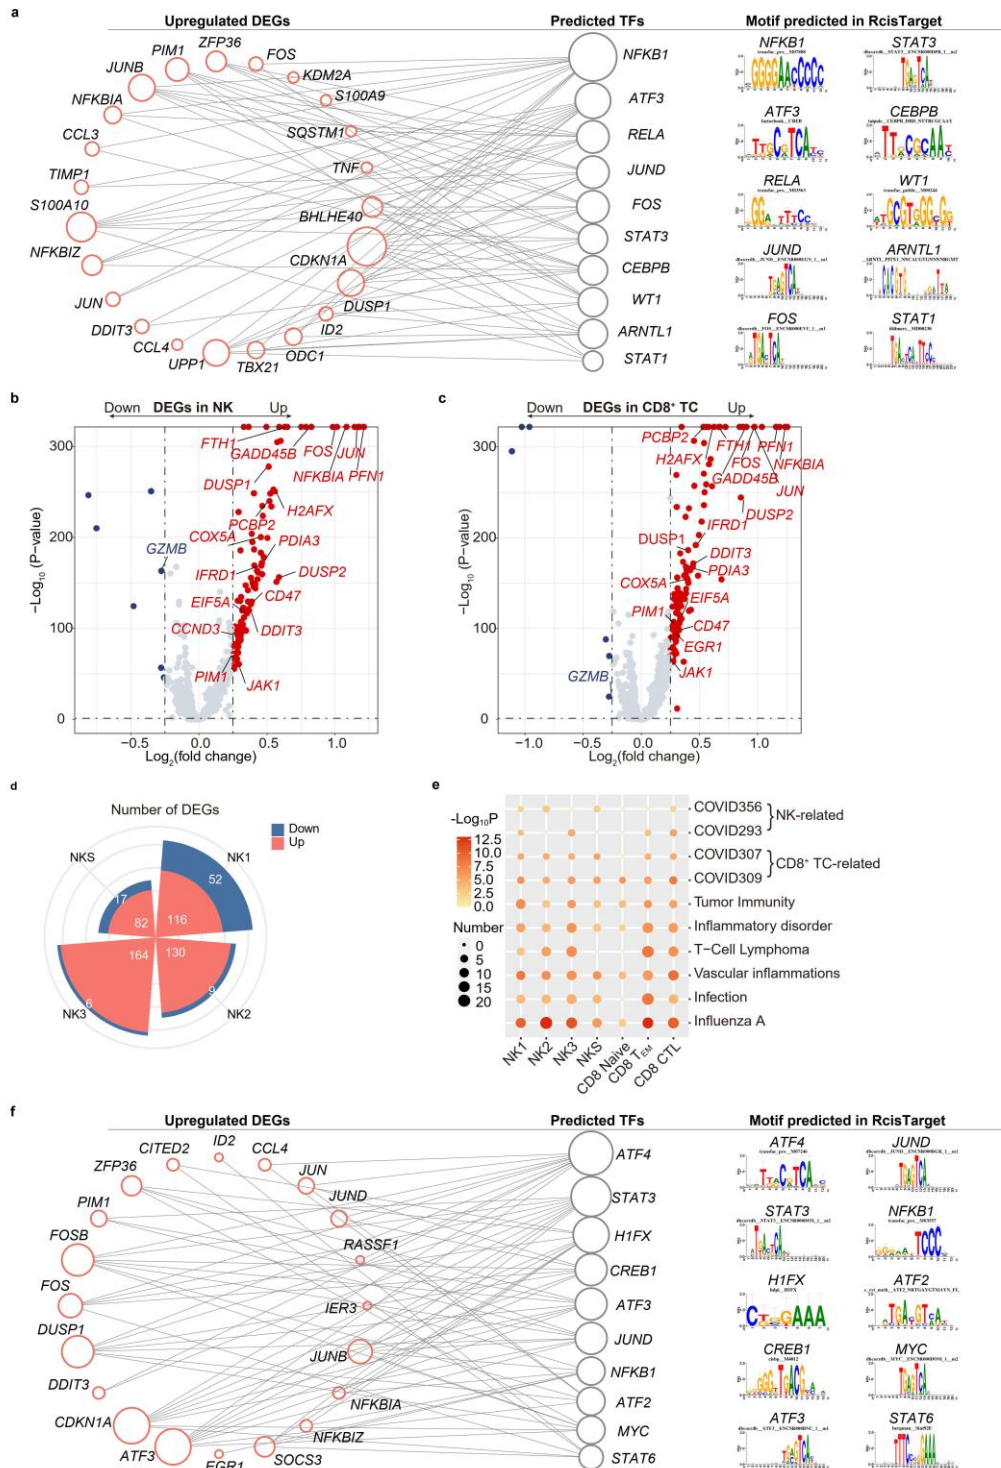

**Supplementary Figure 6. Changes in transcriptional profiles of NK and CD8<sup>+</sup> TC.**

**a** Network visualization of the predicted transcriptional regulatory networks in CD4<sup>+</sup> TC, T-mito and BC subsets enhanced by SU using RcisTarget tool. **b** Volcano plot showing DEGs in NK between preSU and postSU groups. **c** Volcano plot showing DEGs in CD8<sup>+</sup> TC between preSU and postSU groups. **d** Rose diagram showing the numbers of DEGs in NK subsets. **e** Representative COVID and DisGeNET terms in NK and CD8<sup>+</sup> TC subsets upregulated by SU. **f** Network visualization of the predicted transcriptional regulatory networks in NK and CD8<sup>+</sup> TC subsets enhanced by SU using RcisTarget tool.

Figure. S7

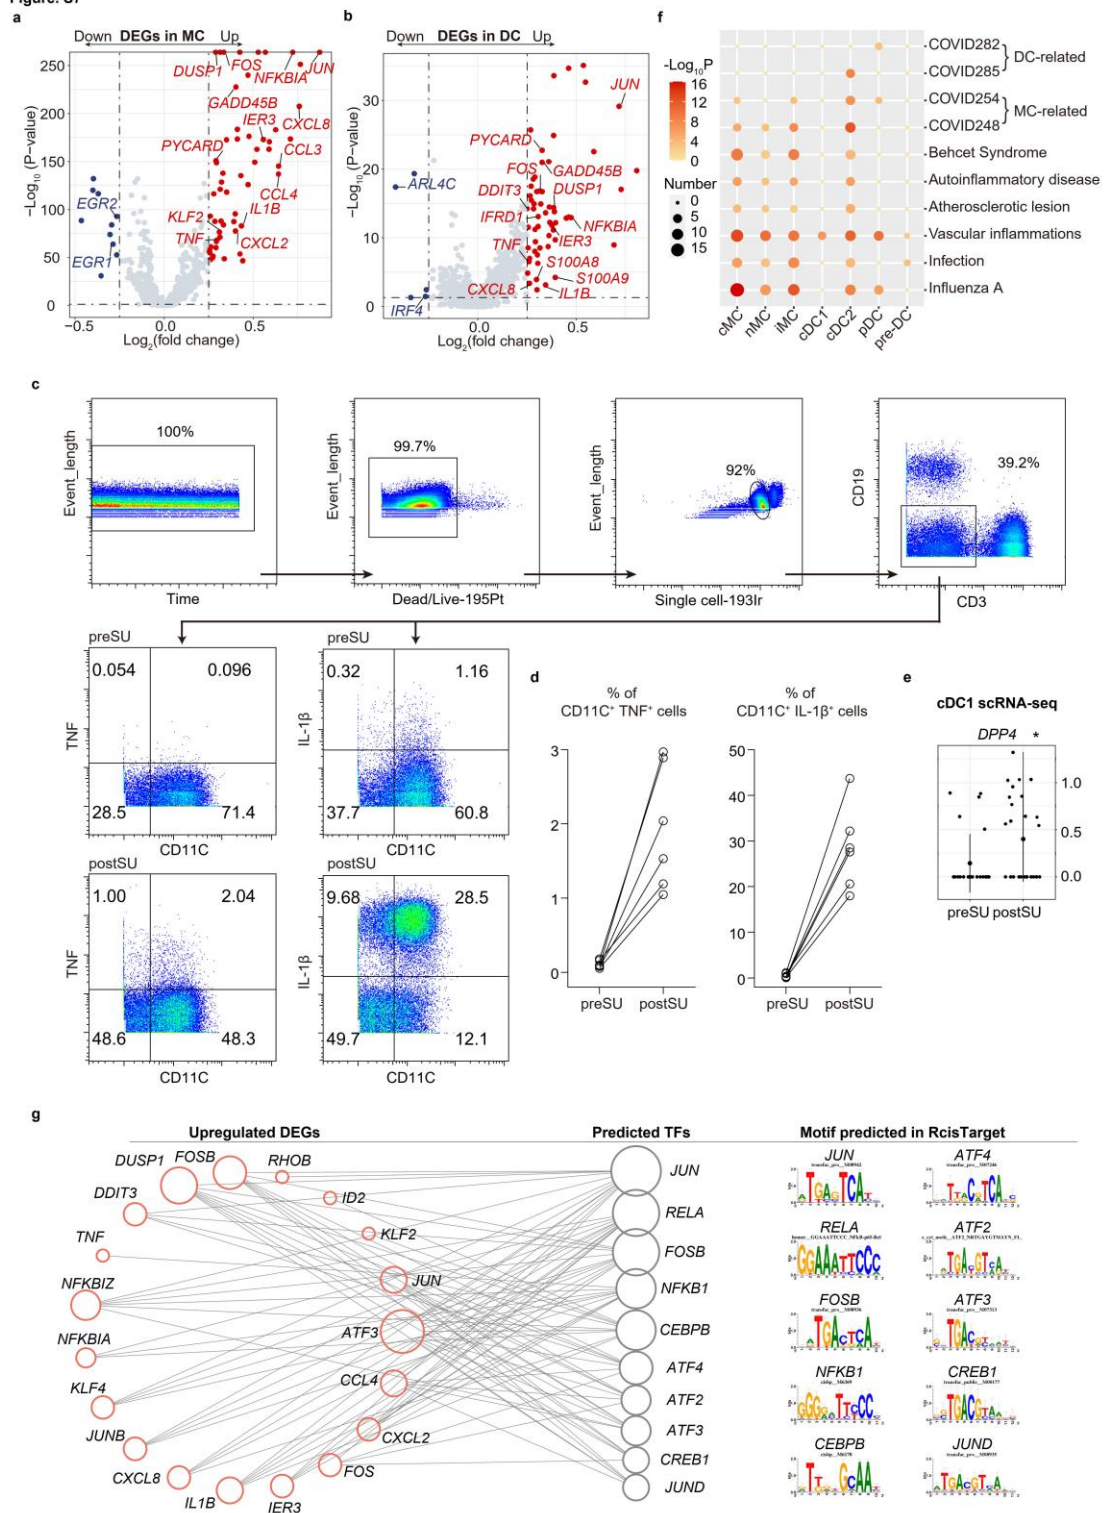

**Supplementary Figure 7. Changes in transcriptional profiles of myeloid cell.**

**a** Volcano plot showing DEGs in MC between preSU and postSU groups. **b** Volcano plot showing DEGs in DC between preSU and postSU groups. **c** Gating strategy for CD11C<sup>+</sup> TNF<sup>+</sup> cells and CD11C<sup>+</sup> IL-1β<sup>+</sup> cells using CyTOF. **d** The percentage of CD11C<sup>+</sup> TNF<sup>+</sup> cells and CD11C<sup>+</sup> IL-1β<sup>+</sup> cells in CD3<sup>+</sup> CD19<sup>-</sup> cells between preSU and postSU groups (n = 6 /group). **e** Violin plot showing the expression of *DPP4* in cDC1 between preSU and postSU groups. **f**

Representative COVID and DisGeNET terms in myeloid cell subsets upregulated by SU. **g** Network visualization of the predicted transcriptional regulatory networks in myeloid cell subsets enhanced by SU using RcisTarget tool. For the box plot within each violin plot, middle lines indicate median values, boxes range from the 25th to 75th percentiles. Significance in d was calculated using two-tailed paired t test; significance in e was calculated using two-sided Wilcoxon test as implemented in the function “compare\_means” with default parameters; \*P < 0.05.

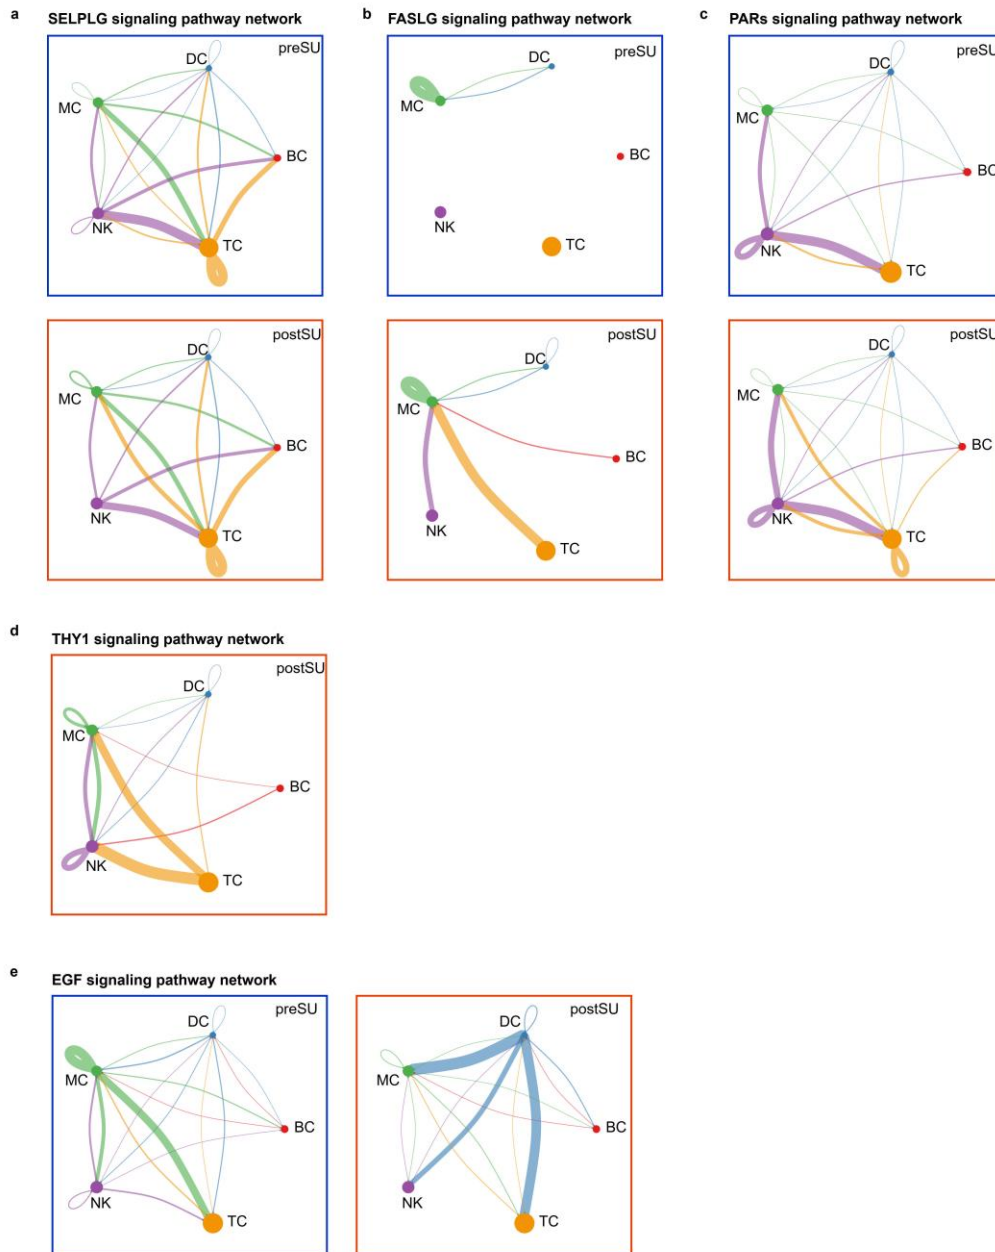

**Supplementary Figure 8. Changes in the cellular communication.**

**a** Circle plot showing the inferred SELPLG signaling networks. **b** Circle plot showing the inferred FASLG signaling networks. **c** Circle plot showing the inferred PARs signaling networks. **d** Circle plot showing the inferred THY1 signaling networks in postSU group. **e** Circle plot showing the inferred EGF signaling networks.

## Supplementary Table

**Supplementary Table 1. Subjects' information.**

| Ident   | Group  | Gender | Age | Disease | scRNA-seq | CytoTOF panel | BMI, kg/m <sup>2</sup> |
|---------|--------|--------|-----|---------|-----------|---------------|------------------------|
| preSU1  | preSU  | female | 39  | -       | √         | √             | 19.14                  |
| preSU2  | preSU  | male   | 50  | -       | √         | √             | 20.83                  |
| preSU3  | preSU  | female | 40  | -       | √         | √             | 25.02                  |
| preSU4  | preSU  | male   | 51  | -       | √         | √             | 21.19                  |
| preSU5  | preSU  | male   | 52  | -       | √         | √             | 22.33                  |
| preSU6  | preSU  | female | 52  | -       | √         | √             | 23.98                  |
| postSU1 | postSU | female | 39  | -       | √         | √             | 18.98                  |
| postSU2 | postSU | male   | 50  | -       | √         | √             | 20.9                   |
| postSU3 | postSU | female | 40  | -       | √         | √             | 25.02                  |
| postSU4 | postSU | male   | 51  | -       | √         | √             | 21.26                  |
| postSU5 | postSU | male   | 52  | -       | √         | √             | 22.46                  |
| postSU6 | postSU | female | 52  | -       | √         | √             | 24.14                  |

**Supplementary Table 2A. CyTOF antibodies.**

| Name        | Conjugated Metal | Source     | Catalogue Number | marker_class |
|-------------|------------------|------------|------------------|--------------|
| CD11C       | 147Sm            | Fluidigm   | 3147008B         | type         |
| CD56/NCAM1  | 176Yb            | Fluidigm   | 3176008B         | type         |
| CD14        | 175Lu            | Fluidigm   | 3175015B         | type         |
| CD279/PD-1  | 155Gd            | Fluidigm   | 3155009B         | type         |
| CD196/CCR6  | 141Pr            | Fluidigm   | 3141003A         | type         |
| CD3         | 154Sm            | Fluidigm   | 3154003B         | type         |
| CD45        | 89Y              | Fluidigm   | 3089003B         | type         |
| CD16        | 209Bi            | Fluidigm   | 3209002B         | type         |
| CD25        | 150Nd            | BD         | 555430           | type         |
| CD123       | 143Nd            | BD         | 555642           | type         |
| CCR7        | 151Eu            | &D Systerr | MAB197-100       | type         |
| CD19        | 172Yb            | 3ioLegend  | 302202           | type         |
| CD57        | 114Cd            | 3ioLegend  | 359602           | type         |
| CD8A        | 111Cd            | 3ioLegend  | 301002           | type         |
| CD4         | 116Cd            | 3ioLegend  | 300502           | type         |
| CD27        | 158Gd            | BD         | 555439           | type         |
| CD45RO      | 165Ho            | 3ioLegend  | 304239           | type         |
| CLEC9A      | 161Dy            | 3ioLegend  | 353802           | type         |
| CD45RA      | 153Eu            | 3ioLegend  | 304143           | type         |
| HLA-DR      | 112Cd            | 3ioLegend  | 307651           | type         |
| CD20        | 113Cd            | 3ioLegend  | 302302           | type         |
| CD1C        | 166Er            | 3ioLegend  | 331502           | type         |
| Foxp3       | 159Tb            | Fluidigm   | 3159028A         | type         |
| CD152/CTLA4 | 170Er            | Fluidigm   | 3170005B         | type         |
| KI67        | 168Er            | 3ioLegend  | 350502           | type         |
| GZMB        | 171Yb            | 3ioLegend  | 372202           | type         |
| GZMK        | 174Yb            | 3ioLegend  | 370502           | type         |
| LEF1        | 142Nd            | 3ioLegend  | 616002           | type         |
| MZB1        | 173Yb            | 3ioLegend  | PA5-80838        | type         |
| T-bet       | 160Gd            | 3ioLegend  | 644825           | type         |
| CD102       | 146Nd            | 3ioLegend  | 328502           | type         |
| CD105       | 162Dy            | 3ioLegend  | 323202           | type         |
| CCR4        | 149Sm            | Fluidigm   | 3149029A         | state        |
| CD183/CXCR3 | 163Dy            | Fluidigm   | 3163004B         | state        |
| CD38        | 164Dy            | 3ioLegend  | 303502           | state        |
| CD127       | 148Nd            | 3ioLegend  | 351302           | state        |
| CCL5        | 145Nd            | Novus      | MAB278-100       | state        |
| GATA3       | 167Er            | Novus      | MAB6330          | state        |

**Supplementary Table 2B. Cell clustering strategy in CyTOF.**

| Celltypes           | Markers             |                                                            |         |
|---------------------|---------------------|------------------------------------------------------------|---------|
|                     | Positive            | Negative                                                   |         |
| T cell              | CD4 Naive           | CD4 CD45RA CCR7 <sup>high</sup>                            | CD45RO  |
|                     | CD4 T <sub>CM</sub> | CD4 CD45RO CCR7 <sup>high</sup>                            |         |
|                     | CD4 T <sub>EM</sub> | CD4 CD45RO CCR7 <sup>low</sup>                             | CD45RA  |
|                     | CD4 Treg            | CD4 CD25                                                   |         |
|                     | CD4 CTL             | CD4 CD57                                                   |         |
|                     | CD4 Tex             | CD4 CD279                                                  |         |
|                     | CD8 Naive           | CD8 CD45RA CCR7 <sup>high</sup>                            | CD45RO  |
|                     | CD8 T <sub>EM</sub> | CD8 CD45RO                                                 | CD45RA  |
|                     | CD8 CTL             | CD8 CD57                                                   |         |
|                     | CD8 Tex             | CD8 CD279                                                  |         |
|                     | DNT                 |                                                            | CD4 CD8 |
|                     | DPT                 | CD4 CD8                                                    |         |
|                     | T-mito              | KI67                                                       |         |
| Natural Killer cell | NK1                 | CD16 <sup>low</sup> CD56 <sup>bright</sup>                 |         |
|                     | NK2                 | CD16 <sup>high</sup> CD56 <sup>dim</sup>                   | CD57    |
|                     | NK3                 | CD16 <sup>high</sup> CD56 <sup>dim</sup> CD57 <sup>+</sup> |         |
| B cell              | NBC                 | CD19 CD20 IGHD                                             |         |
|                     | MBC                 | CD19 CD27                                                  |         |
|                     | PC                  | CD19 CD38                                                  | CD20    |
|                     | ABC                 | CD19 CD11C                                                 |         |
| Monocyte            | cMC                 | CD14 <sup>high</sup>                                       | CD16    |
|                     | nMC                 | CD14 <sup>+</sup> CD16 <sup>+/-</sup>                      |         |
| Dendritic Cell      | iMC                 | CD14 <sup>+/-</sup> CD16 <sup>high</sup>                   |         |
|                     | cDC                 | CD11C HLA-DR                                               | CD123   |
|                     | pDC                 | CD123 CD38                                                 | HLA-DR  |



**Supplementary Table 3. Cell clustering strategy in scRNA-seq.**

| Celltypes           |                     | Markers                                                                  | Negative       |
|---------------------|---------------------|--------------------------------------------------------------------------|----------------|
|                     |                     | Positive                                                                 |                |
|                     | CD34                | <i>CD34 SOX4</i>                                                         |                |
|                     | Megakaryocyte       | <i>PF4 PPBP TUBB1</i>                                                    |                |
|                     | CD4 Naive           | <i>CD4 CCR7<sup>high</sup> CD69<sup>low</sup></i>                        |                |
|                     | CD4 T <sub>CM</sub> | <i>CD4 CCR7<sup>med</sup> CD69<sup>high</sup> or AQP3<sup>high</sup></i> |                |
|                     | CD4 T <sub>EM</sub> | <i>CD4 CCR6</i>                                                          | <i>CCR7</i>    |
|                     | CD4 Treg            | <i>CD4 FOXP3</i>                                                         |                |
| T cell              | CD8 Naive           | <i>CD8 CCR7 LEF1</i>                                                     |                |
|                     | CD8 T <sub>EM</sub> | <i>CD8 GZMK</i>                                                          |                |
|                     | CD8 CTL             | <i>CD8 GNLY</i>                                                          |                |
|                     | DNT                 |                                                                          | <i>CD4 CD8</i> |
|                     | DPT                 | <i>CD4 CD8</i>                                                           |                |
|                     | T-mito              | <i>STMN1 MKI67</i>                                                       |                |
|                     | NK1                 | <i>FCGR3A<sup>low</sup> NCAM1<sup>bright</sup></i>                       |                |
| Natural Killer cell | NK2                 | <i>FCGR3A<sup>high</sup> NCAM1<sup>dim</sup></i>                         | <i>B3GAT1</i>  |
|                     | NK3                 | <i>FCGR3A<sup>high</sup> NCAM1<sup>dim</sup> B3GAT1<sup>+</sup></i>      |                |
|                     | NKS                 | <i>S100B<sup>+</sup></i>                                                 |                |
|                     | NBC                 | <i>CD19 IL4R IGHD</i>                                                    |                |
| B cell              | MBC                 | <i>CD19 CD27 IGHG1</i>                                                   |                |
|                     | PC                  | <i>CD19 MZB1</i>                                                         |                |
|                     | ABC                 | <i>CD19 ITGAX</i>                                                        |                |
|                     | cMC                 | <i>CD14<sup>high</sup></i>                                               | <i>FCGR3A</i>  |
| Monocyte            | nMC                 | <i>CD14<sup>+</sup> FCGR3A<sup>+/-</sup></i>                             |                |
|                     | iMC                 | <i>CD14<sup>+/-</sup> FCGR3A<sup>high</sup></i>                          |                |
| Dendritic Cell      | cDC1                | <i>CLEC9A THBD</i>                                                       |                |
|                     | cDC2                | <i>CD1C</i>                                                              |                |
|                     | pDC                 | <i>CLEC4C IL3RA</i>                                                      | <i>AXL</i>     |
|                     | pre-DC              | <i>AXL IL3RA</i>                                                         |                |
