# Supplementary material for: Effects of poor sleep on the immune cell landscape as assessed by single-cell analysis
Source: PubMed Central journal article supplement (PMC8617259; doi:10.1038/s42003-021-02859-8), 2021-11-25
Supplement: 42003_2021_2859_MOESM2_ESM.pdf [file 42003_2021_2859_MOESM2_ESM.pdf]

## Description of Additional Supplementary Files

**File name:** Supplementary Data 1.

**Description:** The detailed DEGs dataset in five major immune cells.

**File name:** Supplementary Data 2.

**Description:** The detailed DEGs dataset in TC subsets.

**File name:** Supplementary Data 3.

**Description:** The detailed DEGs dataset in NK subsets.

**File name:** Supplementary Data 4.

**Description:** The detailed DEGs dataset in BC subsets.

**File name:** Supplementary Data 5.

**Description:** The detailed DEGs dataset in MC subsets.

**File name:** Supplementary Data 6.

**Description:** The detailed DEGs dataset in DC subsets.

**File name:** Supplementary Data 7.

**Description:** The functional signature with the full gene list used in calculating scores of biological processes.

**File name:** Supplementary Data 8.

**Description:** The detailed cell counts in CyTOF.

**File name:** Supplementary Data 9.

**Description:** Source data underlying plots shown in main figures.
